# Supplementary material
Source: publisher figshare collection journal article supplement (https://tandf.figshare.com/articles/dataset/_/10996784)
Supplement: Supplementary file 2 [file 1]

Archive with 3 entries (3 files):
- tbbb_a_1695575_sm6099.pdf
- tbbb_a_1695575_sm6098.pdf
- tbbb_a_1695575_sm6097.pdf
