# Supplementary material
Source: publisher figshare collection journal article supplement (https://tandf.figshare.com/articles/dataset/_/10996784)
Supplement: Supplementary file 2 [file 1 › tbbb_a_1695575_sm6097.pdf]

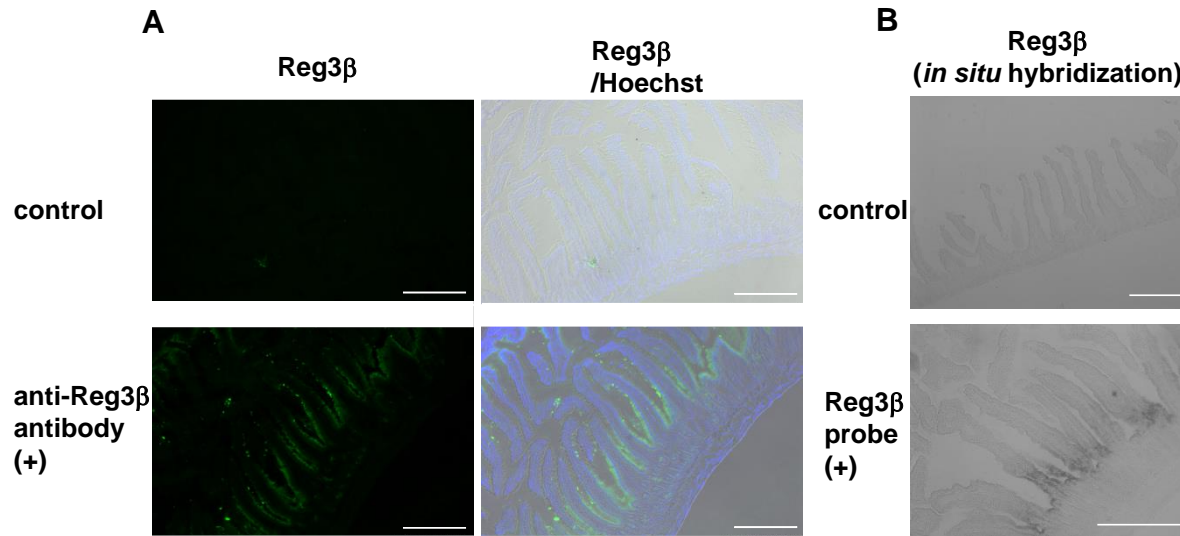

Supplemental data 1. Detection of Reg3 $\beta$  protein and mRNA in jejuna

A: Representative images of immunohistochemistry (Reg3 $\beta$ , green; nucleus, blue) with [anti-Reg3 $\beta$  antibody (+)] or without (control) anti-Reg3 $\beta$  antibody.

B: Representative images of *in situ* hybridization staining (Reg3 $\beta$ , black) with [Reg3 $\beta$  probe (+)] or without Reg3 $\beta$  probe (control).
