# Supplementary material
Source: publisher figshare collection journal article supplement (https://tandf.figshare.com/articles/dataset/_/10996784)
Supplement: Supplementary file 2 [file 1 › tbbb_a_1695575_sm6098.pdf]

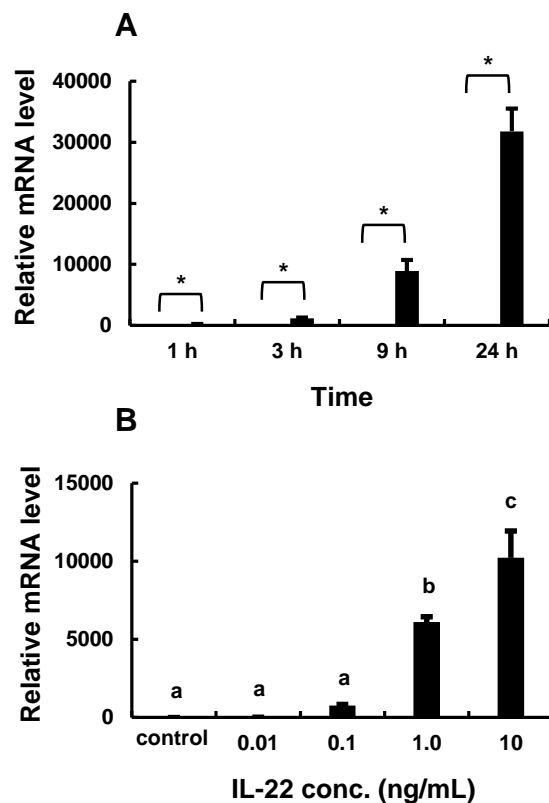

#### Supplemental data 2.

Induction of Reg3β mRNA and protein in enteroids after IL-22 stimulation

A: Timecourse of the mRNA levels of Reg3β after IL-22 treatment (10 ng/mL). The comparison of means was performed with Student's t-test. Asterisks indicate a significant difference ( $p < 0.05$ ). B: Dose-response relationship between IL-22 concentration and Reg3β mRNA levels in enteroids after IL-22 treatment for 24 h. The comparison of means was performed with Tukey's multiple comparison test. Bars without a common letter indicate a significant difference ( $p < 0.05$ ). The mRNA levels of Reg3β are expressed as values relative to those of β2 microglobulin. Bars represent means  $\pm$  SE ( $n = 4$ ).
